# Supplementary material
Source: Springer Nature journal article supplement (https://www.springermedizin.de/resource/supplementary/12879_2012_2261_MOESM2_ESM.docx/9443388)
Supplement: MOESM2 [file 9443388]

**Table 2: proportional selection rules for DUTY follow-up.**

| **Category** | **Definition** | **Location** | **Proportion to be sampled at Day 14** |
| --- | --- | --- | --- |
| > 105 CFU/ml | Pure or 1 predominant species | BOTH NHS lab and Cardiff research lab | 100% (All) |
| >103 and < 105 CFU/ml | Pure or 1 predominant species | Cardiff research lab | 20% in total *(combination of both categories)* |
| >105 CFU/ml | 2 or more species | BOTH NHS lab and Cardiff research lab |
| < 103 CFU/ml and ‘No Growth’ |  | BOTH NHS lab and Cardiff research lab | 10% |
